# Supplementary material for: Controls of Nucleosome Positioning in the Human Genome
Source: PLoS Genet. 2012 Nov 15;8(11):e1003036. doi: 10.1371/journal.pgen.1003036 (PMC3499251; doi:10.1371/journal.pgen.1003036)
Supplement: Table S1 — Summary of MNase-seq data for this study. MNase-seq reads for 7 Yoruba lymphoblastoid cell lines were generated using either an Illumina Genome Analyzer IIx or Illumina HiSeq 2000 sequencer. Read lengths were either 18 bp or 25 bp, and both single-end and paired-end reads were generated. This table summarizes the number of MNase-seq fragments that were retained following mapping and filtering for each sequencing library. The raw sequencing reads have been deposited in GEO under accession number GSE36979. (XLS) [file pgen.1003036.s020.xls]

## Sheet: Sheet1
Paired-end MNase-seq
Cell Line	126-184 bp Frags (millions)	147 bp Frags (millions)	Flowcell:Lanes	Description
18507	90	4	1:1-4, 2:1-4	18 bp GAII
18508	559	39	4:5-8	25 bp HiSeq
18516	314	18	5:5-6	25 bp HiSeq
18522	305	19	5:7-8	25 bp HiSeq
19193	479	14	5:1-4	25 bp HiSeq
19238	634	34	4:1-4	25 bp HiSeq
19239	117	5	1:5-8, 2:5-8	18 bp GAII
Total	2497	134
Single-end MNase-seq
Cell Line	Frags (millions)		Flowcell:Lanes	Description
18516	564	-	3:1-4	25 bp HiSeq
18522	566	-	3:5-8	25 bp HiSeq
Total	1131	-
Combined
Total	3628
