# Supplementary material for: Controls of Nucleosome Positioning in the Human Genome
Source: PLoS Genet. 2012 Nov 15;8(11):e1003036. doi: 10.1371/journal.pgen.1003036 (PMC3499251; doi:10.1371/journal.pgen.1003036)
Supplement: Table S2 — Percentage of nucleosomes with weak, moderate, or strong translational positioning. Positioning scores were calculated for 805,477 randomly sampled regions of 200 bp that had at least 50 midpoints. The percentages indicate the number of regions that meet the specified scoring criteria for observed midpoints, observed midpoints from non-duplicate read pairs, and simulated midpoints. (XLS) [file pgen.1003036.s021.xls]

## Sheet: Sheet1
Positioning	Score Range	Observed (%)	Observed--No Duplicates (%)	Simulated (%)
weak	[0.3, 0.5)	81.3	70.2	27.5
moderate	[0.5, 0.7)	8.39	3.2	0.0669
strong	(0.7,1.0]	0.324	0.124	0.0333
